# Supplementary material for: Increased Prediction Accuracy in Wheat Breeding Trials Using a Marker × Environment Interaction Genomic Selection Model
Source: PubMed Central journal article supplement (PMC4390573; doi:10.1534/g3.114.016097), 2015-02-06
Supplement: supp_g3.114.016097_FileS4.pdf [file supp_g3.114.016097_FileS4.pdf]

## Supporting Information for:

# Increased prediction accuracy in wheat breeding lines using a marker $\times$ environment interaction genomic selection model

by

Marco Lopez-Cruz\*, Jose Crossa\*, David Bonnett\*, Susanne Dreisigacker\*, Jesse Poland<sup>§</sup>, Jean-Luc Jannink<sup>†</sup>, Ravi P. Singh\*, Enrique Autrique\* and Gustavo de los Campos<sup>‡,1</sup>

## 1. Supplementary data

The following files are provided:

**File S1:** Wheat\_GY\_45IBWSN\_standardized\_data.RData

**File S2:** Wheat\_GY\_46IBWSN\_standardized\_data.RData

**File S3:** Wheat\_GY\_47IBWSN\_standardized\_data.RData

Each of these files contains the following R-objects:

- $Y$  ( $n \times s$ ) a numeric matrix with centered and standardized yield records. Each column represent records taken in a particular environment. The column-names of  $Y$ , `colnames(Y)`, gives the codes that identify the environments and the row-names of  $Y$ , `rownames(Y)`, gives the IDs of the wheat lines.
- $G$  ( $n \times n$ ) a genomic relationship matrix computed based on the GBS data. The line IDs can be retrieved using either `rownames(G)` or `colnames(G)`.

## 2. Software and scripts for data analysis

Boxes 1a and 1b provide simplified scripts that can be used to fit the single-environment model. The example uses the third data set (File S3) as an example, but this can be modified by changing the file name in line 2 of Box 1a.

### Box 1a. Within-Environment (i.e., stratified) GBLUP (model fitting)

```
1 rm(list=ls())
2 load("Wheat_GY_47IBWSN_standardized_data.RData")
3 library('BGLR')
4
5 env <- 4 # choose any number in 1:ncol(Y)
6 prefix <- paste(colnames(Y)[env], "_", sep=" ")
7
8 # Fitting the model
9 ETA <- list(G=list(K=G,model='RKHS'))
10 fm <- BGLR(y=Y[,env],ETA=ETA,nIter=12000,burnIn=2000,saveAt=prefix)
11
```

Box 1b provides code that can be used to extract estimates of variance components and predictions obtained after fitting the model in Box 1a.

### Box 1b. Within-Environment (i.e., stratified) GBLUP (post-hoc)

```
1 # Extracting some estimates & predictions
2 fm$varE # residual variance
3 fm$ETA[[1]]$varU # genomic variance
4 fm$ETA[[1]]$u # genomic predictions
5
6 # Some trace plots
7 varE <- scan(paste(prefix,'varE.dat',sep=''))
8 plot(varE,type='o',cex=.5,col=4)
9
10 varU <- scan(paste(prefix,'ETA_1_varU.dat',sep=''))
11 plot(varU,type='o',cex=.5,col=4)
12
```

Box 2a provides code that can be used to fit an across-environment model to combined data from a set of environments. As before, the data set used is defined with the file name given in line 2. In line 5 we define the set of environments to be analyzed jointly; we analyze environments 4 and 5 jointly in the example, but this can be modified easily. For instance, if one wants to analyze all environments jointly, one can set in line 5 `env<-1:ncol(Y)`. The across-environment model includes: (i) environment-specific intercepts; this is defined in lines 12-14 in Box 2a; and (ii) the

effect of the markers, common to all environments; this is defined in lines 16-18. Finally, the model is fitted in line 21.

### Box 2a. Across-Environment Model (model fitting)

```

1  rm(list=ls())
2  load("Wheat_GY_47IBWSN_standarized_data.RData")
3  library('BGLR')
4
5  env <- c(4,5) # choose any set of environments from 1:ncol(Y)
6
7  nEnv <- length(env)
8  prefix <- paste(c('Across',colnames(Y)[env],''),collapse='_')
9
10 y <- as.vector(Y[,env])
11
12 # Fixed effect (env-intercepts)
13 envID <- rep(env,each=nrow(Y))
14 ETA <- list(list(~factor(envID)-1,model="FIXED"))
15
16 # Effects of markers
17 G0 <- kronecker(matrix(nrow=nEnv,ncol=nEnv,1),G)
18 ETA[[2]] <- list(K=G0,model='RKHS')
19
20 # Model Fitting
21 fm <- BGLR(y=y,ETA=ETA,nIter=12000,burnIn=2000,saveAt=prefix)
22

```

Box 2b illustrates how to extract parameter estimates and predictions and how to retrieve samples obtained after fitting the model in Box 2a.

### Box 2b. Across-Environment Model (post-hoc)

```

1  # Extracting estimates of variance parameters
2  fm$varE          # residual variance
3  fm$ETA[[2]]$varU # genomic variance
4
5  # Predictions (this is all within training)
6  tmpEnv <- 1
7  plot(y[envID==env[tmpEnv]]~fm$yHat[envID==env[tmpEnv]])
8
9  # Samples
10 varE <- scan(paste(prefix,'varE.dat',sep=''))
11 plot(varE,type='o',cex=.5,col=4)
12
13 varU0 <- scan(paste(prefix,'ETA_2_varU.dat',sep=''))
14 plot(varU0,type='o',cex=.5,col=4)
15

```

Box 3a provides code that can be used to fit a M×E model to combined data from a set of environments. Similarly, the data set used is defined by setting the file name in line 2. In line 5 we define the set of environments to be analyzed jointly; we analyze environments 4 and 5. The M×E model includes: (i) environment-specific intercepts; this is defined in lines 12-14 in Box 3a; (ii) the main effect of the markers; this is defined in lines 16-18; and (iii) co-variance structures for M×E. These co-variance structures are created in lines 21-25. Finally, the model is fitted in line 28.

### Box 3a. Marker-by-Environment Interaction Model (model fitting)

```

1  rm(list=ls())
2  load("Wheat_GY_47IBWSN_standarized_data.RData")
3  library('BGLR')
4
5  env <- c(4,5) # choose any set of environments from 1:ncol(Y)
6
7  nEnv <- length(env)
8  prefix <- paste(c('MxE',colnames(Y)[env],''),collapse='_')
9
10 y <- as.vector(Y[,env])
11
12 # Fixed effect (env-intercepts)
13 envID <- rep(env,each=nrow(Y))
14 ETA <- list(list(~factor(envID)-1,model="FIXED"))
15
16 # Main effects of markers
17 G0 <- kronecker(matrix(nrow=nEnv,ncol=nEnv,1),G)
18 ETA[[2]] <- list(K=G0,model='RKHS')
19
20 # Adding interaction terms
21 for(i in 1:nEnv){
22   tmp <- rep(0,nEnv) ; tmp[i] <- 1
23   G1 <- kronecker(diag(tmp),G)
24   ETA[[i+2]] <- list(K=G1, model='RKHS')
25 }
26
27 # Model Fitting
28 fm <- BGLR(y=y,ETA=ETA,nIter=12000,burnIn=2000,saveAt=prefix)
29

```

Box 3b illustrates how to extract parameter estimates and predictions and how to retrieve samples obtained after fitting the model in Box 3a.

### Box 3b. Marker-by-Environment Interaction Model (post-hoc)

```
1 # Extracting estimates of variance parameters
2 fm$varE # residual variance
3 fm$ETA[[2]]$varU # genomic variance (main effect)
4 vGInt <- rep(NA,nEnv)
5 for(i in 1:nEnv){ # interaction variances
6   vGInt[i] <- fm$ETA[[i+2]]$varU
7 }
8 vGInt
9
10 # Predictions (this is all within training)
11 tmpEnv <- 1
12 plot(y[envID==env[tmpEnv]]~fm$yHat[envID==env[tmpEnv]])
13
14 # Samples
15 varE <- scan(paste(prefix,'varE.dat',sep=''))
16 plot(varE,type='o',cex=.5,col=4)
17
18 varU0 <- scan(paste(prefix,'ETA_2_varU.dat',sep=''))
19 plot(varU0,type='o',cex=.5,col=4)
20
21 varU1 <- matrix(nrow=length(varU0),ncol=nEnv,NA)
22 for(i in 1:nEnv){
23   varU1[,i] <- scan(paste(prefix,'ETA_',i+2,'_varU.dat',sep=''))
24 }
25
45 tmpEnv <- 1
46 plot(varU1[,tmpEnv],type='o',col=4,cex=.5)
47
```

Boxes 1a, 2a, and 3a illustrate how to fit models to the full data set. Only slight modifications of the code are needed to assess prediction accuracy of TRN-TST experiments. BGLR supports missing values in the response; therefore, to assess prediction accuracy in a testing data set, one possibility is to insert NAs in the entries in the testing data set. The following Boxex illustrates how to create a TRN-TST partition for CV1 (Box 4a) and one for CV2 (Box 4b). After runing this code, the matrices YNA has missing values for the entries corresponding to the TST set.

#### Box 4a. Creating a Testing Sets for CV1

```
1 rm(list=ls())
2 load("Wheat_GY_47IBWSN_standarized_data.RData")
3 library('BGLR')
4 set.seed(12345)
5
6 env <- c(4,5) # choose any set of environments from 1:ncol(Y)
7 nEnv <- length(env)
8 Y <- Y[,env]
9 n <- nrow(Y)
10
11 percTST<-0.3
12 nTST <- round(percTST*n)
13 tst<-sample(1:n,size=nTST,replace=FALSE)
14 YNA <- Y
15 YNA[tst,]<-NA
```

#### Box 4b. Creating a Testing Sets for CV2

```
1  rm(list=ls())
2  load("Wheat_GY_47IBWSN_standardized_data.RData")
3  library('BGLR')
4  set.seed(12345)
5
6  env <- c(4,5) # choose any set of environments from 1:ncol(Y)
7  nEnv <- length(env)
8  Y <- Y[,env]
9  n <- nrow(Y)
10
11  percTST<-0.3
12  nTST <- round(percTST*n)
13  nNA <- nEnv*nTST
14  if(nNA<n){ indexNA <- sample(1:n,nNA,replace=FALSE) }
15  if(nNA>=n){
16    nRep <- floor(nNA/n)
17    remain <- sample(1:n,nNA%n,replace=FALSE)
18    a0 <- sample(1:n,n,replace=FALSE)
19    indexNA <- rep(a0,nRep)
20    if(length(remain)>0){
21      a1 <- floor(length(indexNA)/nTST)*nTST
22      a2 <- nNA - a1 - length(remain)
23      bb <- sample(a0[!a0%in%remain],a2,replace=FALSE)
24      noInIndexNA <- c(rep(a0,nRep-1),a0[!a0%in%bb])
25      indexNA <- c(noInIndexNA,bb,remain)
26    }
27  }
28  indexEnv <- rep(1:nEnv,each=nTST)
30  YNA <- Y
31  for(j in 1:nEnv) YNA[indexNA[indexEnv==j],j] <- NA
32
```

Once the YNA matrix is created (see Box 4a for CV1-type partitions and Box 4b for CV2-type partitions), this data matrix can be used instead of the original data-matrix (Y) to fit models using the code presented in Boxes 1a, 2a and 3a. The following Box illustrates how to fit the single-environment model and a two-environment model for the set of environments selected in Box 4.

### Box 5. Fitting Models to TRN-TST Partitions (continues from Box 4b)

```
1  ## Single environments models #####
2  YHatSE <- matrix(nrow=nrow(Y),ncol=ncol(Y),NA)
3  ETA <- list(G=list(K=G,model='RKHS'))
4
5  for(i in 1:nEnv){
6    prefix <- paste(colnames(Y)[i],"_",sep="")
7    fm <- BGLR(y=YNA[,i],ETA=ETA,nIter=12000,burnIn=2000,saveAt=prefix)
8    YHatSE[,i] <- fm$yHat
9  }
10
11 ## Across environment model (ignoring GxE) #####
12 yNA <- as.vector(YNA)
13
14 # Fixed effect (env-intercepts)
15 envID <- rep(env,each=nrow(Y))
16 ETA <- list(list(~factor(envID)-1,model="FIXED"))
17
18 # Main effects of markers
19 G0 <- kronecker(matrix(nrow=nEnv,ncol=nEnv,1),G)
20 ETA[[2]] <- list(K=G0,model='RKHS')
21
22 # Model Fitting
23 prefix <- paste(c('Across',colnames(Y),''),collapse='_')
24 fm <- BGLR(y=yNA,ETA=ETA,nIter=12000,burnIn=2000,saveAt=prefix)
25 YHatAcross <- matrix(fm$yHat,ncol=nEnv)
26
27 ## MxE Interaction Model #####
28 # Adding interaction terms
29 for(i in 1:nEnv){
30   tmp <- rep(0,nEnv) ; tmp[i] <- 1; G1 <- kronecker(diag(tmp),G)
31   ETA[[i+2]] <- list(K=G1,model='RKHS')
32 }
33
34 # Model Fitting
35 prefix <- paste(c('MxE',colnames(Y),''),collapse='_')
36 fm <- BGLR(y=yNA,ETA=ETA,nIter=12000,burnIn=2000,saveAt=prefix)
37 YHatInt <- matrix(fm$yHat,ncol=nEnv)
38
```



In Box 6 we illustrate how to compute the within-environment prediction accuracy in the testing data set used in Box 5. Note that the estimates reported in the article are the average of 50 TRN-TST partitions.

**Box 6. Computing the within-environment correlation (continues from Box 5)**

```
1 COR <- matrix(nrow=length(env),ncol=3,NA)
2 colnames(COR) <- c('SingleEnv', 'AcrossEnv', 'MxE')
3 rownames(COR) <- colnames(Y)
4
5 for(i in 1:nEnv){
6   tst <- which(is.na(YNA[,i]))
7   COR[i,1] <- cor(Y[tst,i],YHatSE[tst,i])
8   COR[i,2] <- cor(Y[tst,i],YHatAcross[tst,i])
9   COR[i,3] <- cor(Y[tst,i],YHatInt[tst,i])
10 }
11 COR
```
